# Supplementary material for: A conserved transcriptional signature supports metastatic colonisation of the liver by pancreatic cancer cells
Source: Research Square preprint supplement (doi:10.21203/rs.3.rs-1635604/v1), 2022-06-13
Supplement: Supplementary file 1 [file f80e32a6b20805036496a2f2.xlsx]

## Sheet: table info
Name	Title	Description
Table 1	CCLE PDAC cell lines	List of PDAC cell lines used in DepMap analysis
Table 2	Hallmark genesets enriched in liver-tropic PDAC cell lines	Results from limma analysis of hallmark genesets (GSVA)
Table 3	Transcription factors enriched in liver-tropic PDAC cell lines	Results from limma analysis of estimated transcription factor activities (VIPER)
Table 4	SNPs enriched in liver-tropic PDAC cell lines	Results from limma analysis of gene-level SNPs
Table 5	CNVs enriched in liver-tropic PDAC cell lines	Results from limma analysis of gene-level CNVs
Table 6	Cytoband CNVs enriched in liver-tropic PDAC cell lines	Results from limma analysis of cytoband level CNVs

## Sheet: table1_pdac_ccle_info
CCLE_name	depmap_id	name	Liver tropic?
KP4_PANCREAS	ACH-000265	KP4	TRUE
PSN1_PANCREAS	ACH-000320	PSN1	TRUE
SUIT2_PANCREAS	ACH-000652	SUIT2	TRUE
PATU8988T_PANCREAS	ACH-000023	PATU8988T	TRUE
HS766T_PANCREAS	ACH-000178	HS766T	TRUE
DANG_PANCREAS	ACH-000243	DANG	TRUE
PANC1_PANCREAS	ACH-000164	PANC1	TRUE
QGP1_PANCREAS	ACH-000347	QGP1	TRUE
PATU8902_PANCREAS	ACH-000599	PATU8902	TRUE
L33_PANCREAS	ACH-000685	L33	TRUE
PK1_PANCREAS	ACH-000307	PK1	FALSE
HPAC_PANCREAS	ACH-000270	HPAC	FALSE
ASPC1_PANCREAS	ACH-000222	ASPC1	FALSE
KP3_PANCREAS	ACH-000108	KP3	FALSE
MIAPACA2_PANCREAS	ACH-000601	MIAPACA2	FALSE
YAPC_PANCREAS	ACH-000332	YAPC	FALSE
PK45H_PANCREAS	ACH-000468	PK45H	FALSE
CFPAC1_PANCREAS	ACH-000138	CFPAC1	FALSE
PANC0327_PANCREAS	ACH-000139	PANC0327	FALSE
HUPT3_PANCREAS	ACH-000118	HUPT3	FALSE
KP2_PANCREAS	ACH-000281	KP2	FALSE
CAPAN2_PANCREAS	ACH-000107	CAPAN2	FALSE
PANC0203_PANCREAS	ACH-000042	PANC0203	FALSE
SW1990_PANCREAS	ACH-000155	SW1990	FALSE
SNU213_PANCREAS	ACH-000266	SNU213	FALSE
SNU410_PANCREAS	ACH-000517	SNU410	FALSE
PK59_PANCREAS	ACH-000205	PK59	FALSE
PANC0403_PANCREAS	ACH-000235	PANC0403	FALSE
PANC1005_PANCREAS	ACH-000060	PANC1005	FALSE
BXPC3_PANCREAS	ACH-000535	BXPC3	FALSE
TCCPAN2_PANCREAS	ACH-000502	TCCPAN2	FALSE
PANC0813_PANCREAS	ACH-000417	PANC0813	FALSE
PATU8988S_PANCREAS	ACH-000022	PATU8988S	FALSE

## Sheet: table2_hallmark_genesets
Geneset	logFC	AveExpr	t	P.Value	adj.P.Val	B
HALLMARK_COMPLEMENT	-0.247138	0.000405931	-3.65271	0.000747191	0.0186712	-0.571758
HALLMARK_COAGULATION	-0.255102	0.00583743	-3.60373	0.000861396	0.0186712	-0.701303
HALLMARK_UNFOLDED_PROTEIN_RESPONSE	0.249558	-0.0454296	3.51253	0.00112027	0.0186712	-0.940233
HALLMARK_MYC_TARGETS_V2	0.466845	-0.0271478	3.40565	0.00151886	0.0189857	-1.21629
HALLMARK_INTERFERON_GAMMA_RESPONSE	-0.330154	0.00153412	-3.31923	0.00193703	0.0193703	-1.43624
HALLMARK_INTERFERON_ALPHA_RESPONSE	-0.391927	-0.0126117	-3.19325	0.00274735	0.0204847	-1.75125
HALLMARK_TNFA_SIGNALING_VIA_NFKB	-0.28907	-0.0161399	-3.13069	0.00326048	0.0204847	-1.90509
HALLMARK_KRAS_SIGNALING_UP	-0.216761	0.0125587	-3.12622	0.00330047	0.0204847	-1.91602
HALLMARK_MYC_TARGETS_V1	0.382945	-0.0360985	3.0854	0.00368724	0.0204847	-2.01537
HALLMARK_ESTROGEN_RESPONSE_EARLY	-0.197461	-0.0133008	-2.96365	0.00511011	0.0251236	-2.30698
HALLMARK_MYOGENESIS	-0.153589	-0.00181714	-2.93402	0.0055272	0.0251236	-2.37686
HALLMARK_KRAS_SIGNALING_DN	-0.186537	0.0220596	-2.89604	0.00610845	0.0254519	-2.46577
HALLMARK_ESTROGEN_RESPONSE_LATE	-0.183553	-0.013482	-2.8336	0.00718961	0.0276524	-2.61034
HALLMARK_APICAL_JUNCTION	-0.175051	-0.00347825	-2.79712	0.00790117	0.0282185	-2.69386
HALLMARK_APICAL_SURFACE	-0.211392	-0.000335234	-2.71761	0.00968466	0.0322822	-2.87341
HALLMARK_OXIDATIVE_PHOSPHORYLATION	0.263145	-0.0309336	2.59267	0.0132522	0.0414132	-3.14847
HALLMARK_APOPTOSIS	-0.174084	-0.0129792	-2.5166	0.0159785	0.0469955	-3.3115
HALLMARK_WNT_BETA_CATENIN_SIGNALING	0.174277	-0.0255292	2.46586	0.018072	0.0501999	-3.41833
HALLMARK_INFLAMMATORY_RESPONSE	-0.197745	0.00785242	-2.33886	0.024446	0.0643316	-3.67872
HALLMARK_P53_PATHWAY	-0.139968	-0.031167	-2.29647	0.0269865	0.0674662	-3.76335
HALLMARK_IL6_JAK_STAT3_SIGNALING	-0.189398	0.0106729	-2.22165	0.0320529	0.0743448	-3.90986
HALLMARK_G2M_CHECKPOINT	0.252571	-0.0271392	2.21271	0.0327117	0.0743448	-3.92712
HALLMARK_HYPOXIA	-0.148873	-0.0211723	-2.1466	0.0379673	0.0825375	-4.05304
HALLMARK_E2F_TARGETS	0.259187	-0.0176578	2.04658	0.0473367	0.0986182	-4.23786
HALLMARK_IL2_STAT5_SIGNALING	-0.122676	-0.00536377	-2.02052	0.0500868	0.100174	-4.28484
HALLMARK_MTORC1_SIGNALING	0.156826	-0.0338813	1.95503	0.0576198	0.110807	-4.40078
HALLMARK_DNA_REPAIR	0.144323	-0.0314882	1.85174	0.0714844	0.132378	-4.57727
HALLMARK_ALLOGRAFT_REJECTION	-0.123791	0.00455758	-1.7176	0.0936346	0.167205	-4.79444
HALLMARK_EPITHELIAL_MESENCHYMAL_TRANSITION	-0.159791	-0.00198498	-1.63456	0.110019	0.189688	-4.92186
HALLMARK_HEME_METABOLISM	-0.0846056	-0.0213762	-1.61421	0.114375	0.190624	-4.95225
HALLMARK_UV_RESPONSE_DN	-0.0992385	-0.0272762	-1.42843	0.160961	0.259615	-5.21414
HALLMARK_CHOLESTEROL_HOMEOSTASIS	-0.119898	-0.0208961	-1.33528	0.189365	0.290619	-5.33464
HALLMARK_MITOTIC_SPINDLE	0.100895	-0.0476011	1.32778	0.191808	0.290619	-5.34402
HALLMARK_REACTIVE_OXYGEN_SPECIES_PATHWAY	0.110178	-0.0468438	1.29218	0.203741	0.299619	-5.3879
HALLMARK_XENOBIOTIC_METABOLISM	-0.0796339	-0.0146152	-1.27464	0.209822	0.299745	-5.40911
HALLMARK_BILE_ACID_METABOLISM	-0.0879355	5.55314e-05	-1.21196	0.232667	0.323148	-5.48273
HALLMARK_ANGIOGENESIS	-0.0924718	-0.00897671	-0.968482	0.338646	0.456365	-5.7357
HALLMARK_NOTCH_SIGNALING	-0.0744084	-0.0143889	-0.951999	0.346837	0.456365	-5.75089
HALLMARK_TGF_BETA_SIGNALING	-0.0895559	-0.0235535	-0.928774	0.358599	0.459742	-5.77187
HALLMARK_SPERMATOGENESIS	0.0548198	0.0255163	0.887705	0.380027	0.475034	-5.80776
HALLMARK_PI3K_AKT_MTOR_SIGNALING	0.0430266	-0.0221842	0.649011	0.520055	0.634213	-5.98524
HALLMARK_ADIPOGENESIS	0.0393293	-0.0361492	0.561603	0.577532	0.687538	-6.03675
HALLMARK_HEDGEHOG_SIGNALING	-0.0401563	-0.00232133	-0.509176	0.613437	0.713299	-6.06414
HALLMARK_PEROXISOME	-0.0286449	-0.0182826	-0.464181	0.645044	0.733005	-6.08553
HALLMARK_ANDROGEN_RESPONSE	-0.0259849	-0.0297401	-0.368133	0.714722	0.794136	-6.12464
HALLMARK_UV_RESPONSE_UP	-0.0162171	-0.0338723	-0.273827	0.785632	0.853948	-6.15431
HALLMARK_GLYCOLYSIS	-0.0147005	-0.031255	-0.242188	0.809876	0.861571	-6.16232
HALLMARK_FATTY_ACID_METABOLISM	0.00704602	-0.0221616	0.0992901	0.921406	0.944136	-6.18628
HALLMARK_PROTEIN_SECRETION	-0.00853664	-0.0439553	-0.0944146	0.925253	0.944136	-6.18675
HALLMARK_PANCREAS_BETA_CELLS	0.00228356	0.0470438	0.0278683	0.977906	0.977906	-6.19075

## Sheet: table3_transcription_factors
Transcription Factor	logFC	AveExpr	t	P.Value	adj.P.Val	B	rank
KLF4	-1.67373	0.0499271	-3.9547	0.000339597	0.0156367	0.183726	1
FOXA2	-1.3621	0.00730409	-3.84797	0.000463112	0.0156367	-0.0985782	2
TP53	-2.52459	0.152563	-3.82373	0.000496725	0.0156367	-0.162276	3
STAT5B	-1.42096	0.00258449	-3.79228	0.000543886	0.0156367	-0.244695	4
STAT3	-2.20176	0.0637792	-3.46859	0.00136218	0.0313302	-1.07602	5
STAT6	-1.4698	0.0311378	-3.40264	0.00163619	0.0313602	-1.24123	6
SOX9	-1.45251	0.0477537	-3.15237	0.00323719	0.0430696	-1.85345	7
SPI1	-2.2582	-0.108019	-3.14323	0.00331746	0.0430696	-1.87534	8
IRF1	-2.16009	0.0840376	-3.12714	0.00346344	0.0430696	-1.91379	9
MYC	3.18148	0.0529188	3.07057	0.00402627	0.0430696	-2.04809	10
VDR	-1.40829	-0.0279809	-3.06191	0.0041197	0.0430696	-2.06852	11
ATF2	-1.35629	0.0895626	-2.94982	0.00552964	0.0477367	-2.33007	12
STAT2	-3.71726	0.342417	-2.91062	0.00612175	0.0477367	-2.42017	13
TFAP2A	-1.27222	0.059109	-2.90449	0.00621953	0.0477367	-2.43419	14
HNF4A	-1.66941	-0.0635299	-2.88521	0.00653677	0.0477367	-2.47818	15
FOXA1	-1.23331	-0.0373103	-2.86192	0.0069402	0.0477367	-2.53109	16
SP3	-1.80118	-0.0531179	-2.84419	0.00726274	0.0477367	-2.57118	17
SRF	-1.28718	-0.0117006	-2.82244	0.00767773	0.0477367	-2.62017	18
FOXL2	-1.43951	0.0107811	-2.78037	0.00854367	0.0477367	-2.71425	19
STAT5A	-1.10248	0.059455	-2.77877	0.00857833	0.0477367	-2.71781	20
STAT1	-2.8023	0.0562116	-2.77243	0.00871714	0.0477367	-2.73192	21
SP1	-2.11211	0.0774129	-2.72718	0.00976875	0.0510639	-2.83191	22
NFKB2	1.15971	-0.0775164	2.69835	0.0104992	0.0524958	-2.89509	23
NFKB1	-2.62669	0.0962921	-2.67321	0.0111769	0.0535558	-2.94982	24
EGR1	-1.26285	0.0978724	-2.61741	0.0128283	0.0590102	-3.07009	25
RELA	-2.49954	0.166924	-2.59194	0.0136543	0.060394	-3.12442	26
ZEB1	1.54164	-0.21935	2.55314	0.0150072	0.0639196	-3.2065	27
RELB	-1.5061	0.129629	-2.50735	0.0167613	0.0667675	-3.30228	28
ETV4	-1.27122	-0.0103784	-2.50548	0.016837	0.0667675	-3.30618	29
JUN	-2.35148	-0.020597	-2.46239	0.0186643	0.0715467	-3.39517	30
FOXO1	-1.38335	-0.0355906	-2.43927	0.0197179	0.0719662	-3.44249	31
FOS	-1.42669	0.00107982	-2.43273	0.0200254	0.0719662	-3.4558	32
ESR1	-1.61376	0.0823108	-2.41017	0.0211203	0.073601	-3.50157	33
E2F4	3.68299	0.252091	2.32935	0.0255027	0.0862592	-3.66303	34
CEBPB	-1.23087	0.00181705	-2.30207	0.0271578	0.0881853	-3.71664	35
ELK1	-1.05214	0.0200364	-2.2891	0.0279775	0.0881853	-3.74195	36
E2F1	2.24958	0.0874489	2.28298	0.0283727	0.0881853	-3.75388	37
E2F3	1.14356	0.0640332	2.25515	0.0302303	0.0903887	-3.80773	38
REL	-1.18086	0.128658	-2.24122	0.0312011	0.0903887	-3.83451	39
USF2	-1.05887	0.00501682	-2.23786	0.0314396	0.0903887	-3.84096	40
CEBPA	-1.34004	0.00214277	-2.204	0.0339316	0.0951741	-3.90545	41
CEBPD	-0.936185	0.018271	-2.18841	0.0351373	0.0962094	-3.9349	42
SMAD4	-1.23221	0.0248883	-2.14564	0.0386429	0.102541	-4.01488	43
HSF1	-0.941105	0.0551271	-2.13878	0.0392332	0.102541	-4.0276	44
FOSL2	-0.782298	0.034519	-2.08373	0.0442646	0.113121	-4.1285	45
IRF9	-1.55485	0.0783595	-2.0642	0.0461824	0.114442	-4.16383	46
RUNX3	0.767589	-0.00725799	2.05833	0.0467718	0.114442	-4.17437	47
POU2F1	-0.733678	-0.00296365	-2.02482	0.0502698	0.118836	-4.23423	48
SMAD3	-1.2559	-0.0543672	-2.02144	0.0506345	0.118836	-4.24021	49
GLI2	0.717608	-0.120777	1.96126	0.0575343	0.132329	-4.3456	50
E2F2	1.66564	0.152601	1.94722	0.0592555	0.133615	-4.36981	51
ESR2	-0.778655	0.0755435	-1.91739	0.0630628	0.139466	-4.4208	52
JUND	-0.894466	0.0540954	-1.88639	0.0672403	0.145806	-4.47312	53
GATA1	-0.696811	-0.108205	-1.87762	0.0684655	0.145806	-4.48781	54
ETS1	-1.32502	0.0371686	-1.7913	0.081564	0.170543	-4.62925	55
GATA3	-0.806882	0.0511205	-1.75369	0.087903	0.178131	-4.68916	56
MYB	-0.693449	-0.0911844	-1.75146	0.0882912	0.178131	-4.69268	57
LEF1	-0.724639	0.00441882	-1.69144	0.0992989	0.196886	-4.78595	58
WT1	-0.662599	0.0504297	-1.64975	0.1076	0.207153	-4.84914	59
RARA	-0.901523	0.0244282	-1.64742	0.10808	0.207153	-4.85262	60
FOXO3	-0.999318	0.0181819	-1.63132	0.111446	0.207962	-4.87663	61
PAX6	-0.725762	-0.000258521	-1.62816	0.112119	0.207962	-4.88132	62
CDX2	-1.00332	-0.0100225	-1.57537	0.123824	0.226029	-4.95848	63
HIF1A	-1.02555	-0.0335726	-1.56274	0.126769	0.227363	-4.97662	64
PAX8	0.572423	-0.0235226	1.55538	0.12851	0.227363	-4.98713	65
RUNX1	-0.736605	0.0559266	-1.54071	0.132039	0.230068	-5.00795	66
TCF7L2	-0.70095	0.0089569	-1.49657	0.143127	0.245665	-5.06954	67
FOSL1	-0.692315	-0.0445555	-1.47301	0.149344	0.248909	-5.10178	68
TFAP2C	-0.659547	-0.0707674	-1.47301	0.149345	0.248909	-5.10179	69
FOXM1	0.850946	0.0175852	1.42591	0.162417	0.266828	-5.16488	70
ARNTL	-0.691642	-0.00256075	-1.41065	0.166837	0.268586	-5.18491	71
NR5A1	-0.470549	-0.0870722	-1.40616	0.168158	0.268586	-5.19079	72
AR	-0.645432	0.0673077	-1.33546	0.190019	0.297319	-5.28089	73
GATA2	-0.613939	-0.0407611	-1.32869	0.192221	0.297319	-5.2893	74
FOXO4	-0.655348	-0.0205741	-1.32356	0.193904	0.297319	-5.29564	75
SREBF1	0.923689	0.0508924	1.31115	0.19802	0.299635	-5.3109	76
HNF1A	-0.814251	-0.0623736	-1.28645	0.20641	0.306591	-5.34089	77
USF1	-0.584265	0.0453821	-1.282	0.207949	0.306591	-5.34623	78
TAL1	-0.468667	-0.00106928	-1.26507	0.213885	0.311351	-5.36641	79
NFYA	-0.564598	-0.0475299	-1.24465	0.221215	0.317996	-5.39044	80
RXRA	-0.511169	-0.0925004	-1.18333	0.24435	0.346418	-5.46043	81
ETS2	-0.466615	0.00969061	-1.17656	0.247011	0.346418	-5.46796	82
ZBTB33	0.540297	0.0430425	1.15798	0.254415	0.352503	-5.48841	83
CREB1	-0.605319	-0.0050382	-1.14951	0.257845	0.353002	-5.49764	84
PPARA	-0.417803	0.00806557	-1.09913	0.278928	0.377373	-5.5512	85
TP63	-0.703865	-0.00782948	-1.08723	0.284084	0.37988	-5.56353	86
MYCN	0.7125	0.0967818	1.07429	0.289762	0.383018	-5.57678	87
PRDM14	-0.770696	-0.0853676	-1.00199	0.322966	0.422057	-5.64813	88
STAT4	-0.391455	0.0216816	-0.945415	0.350682	0.453128	-5.70068	89
FOXP1	-0.834067	0.0388947	-0.883584	0.38272	0.483894	-5.7548	90
ATF4	-0.565761	-0.0739476	-0.883234	0.382907	0.483894	-5.75509	91
TFDP1	0.700178	0.116643	0.850421	0.400651	0.500814	-5.78238	92
MITF	-0.30369	-0.0226274	-0.743472	0.461968	0.571251	-5.86441	93
YY1	-0.318315	0.0370007	-0.728132	0.471192	0.576458	-5.8753	94
EPAS1	-0.264799	0.0032403	-0.609615	0.545904	0.660832	-5.952	95
ATF1	-0.183068	0.129053	-0.51036	0.612881	0.728401	-6.00598	96
PGR	-0.188635	-0.0220585	-0.508185	0.61439	0.728401	-6.00706	97
BACH1	-0.176659	0.0922823	-0.448968	0.656117	0.769933	-6.03465	98
NR2F2	-0.163699	0.0023981	-0.412554	0.682354	0.78913	-6.04994	99
NFIC	0.164963	0.014486	0.407264	0.6862	0.78913	-6.05206	100
REST	-0.141304	0.014033	-0.360829	0.720314	0.820159	-6.06946	101
SOX10	-0.124162	0.0124838	-0.343788	0.732984	0.824134	-6.07533	102
SOX2	0.347989	-0.170981	0.336887	0.738137	0.824134	-6.07762	103
PPARG	0.120395	0.0284625	0.278187	0.782443	0.859434	-6.09526	104
FLI1	-0.116812	-0.0151588	-0.275225	0.7847	0.859434	-6.09607	105
TWIST1	0.0885241	-0.0215532	0.216239	0.830009	0.900481	-6.11025	106
NR3C1	0.0726166	-0.0486542	0.16996	0.865983	0.930729	-6.119	107
ERG	0.0548898	-0.0568572	0.133489	0.894542	0.94678	-6.12441	108
CTCF	0.0437274	0.0378989	0.121196	0.904202	0.94678	-6.12595	109
TCF3	-0.0514254	0.00220169	-0.113758	0.910055	0.94678	-6.1268	110
ZNF263	-0.109085	0.0102088	-0.10894	0.913849	0.94678	-6.12733	111
NFE2L2	-0.0458637	-0.0394505	-0.0979394	0.922518	0.947228	-6.12844	112
NFATC2	0.0224559	0.0423965	0.064168	0.949188	0.964996	-6.13113	113
ATF6	-0.0328084	0.0581479	-0.0547904	0.956605	0.964996	-6.13167	114
SREBF2	-0.00518374	0.0486907	-0.00725517	0.994251	0.994251	-6.13312	115

## Sheet: table4_SNPs
Gene	logFC	AveExpr	t	P.Value	adj.P.Val	B
WDFY4	0.3	0.0909091	3.44208	0.00106221	0.499459	-1.64751
COPA	0.3	0.0909091	3.44208	0.00106221	0.499459	-1.64751
PPP1R3A	0.3	0.0909091	3.44208	0.00106221	0.499459	-1.64751
ANXA4	0.3	0.0909091	3.44208	0.00106221	0.499459	-1.64751
CFB	0.3	0.0909091	3.44208	0.00106221	0.499459	-1.64751
SCRIB	0.3	0.0909091	3.44208	0.00106221	0.499459	-1.64751
MUC5B	0.313043	0.181818	2.77538	0.0073578	0.499459	-2.7684
SCN10A	0.313043	0.181818	2.77538	0.0073578	0.499459	-2.7684
URB2	0.256522	0.121212	2.57782	0.0124375	0.499459	-3.06971
TPO	0.256522	0.121212	2.57782	0.0124375	0.499459	-3.06971
WDFY3	0.256522	0.121212	2.57782	0.0124375	0.499459	-3.06971
MCM3	0.256522	0.121212	2.57782	0.0124375	0.499459	-3.06971
PLXNA4	0.256522	0.121212	2.57782	0.0124375	0.499459	-3.06971
RIMS2	0.256522	0.121212	2.57782	0.0124375	0.499459	-3.06971
NBPF10	0.256522	0.121212	2.57782	0.0124375	0.499459	-3.06971
NAV2	0.256522	0.121212	2.57782	0.0124375	0.499459	-3.06971
RYR3	0.256522	0.121212	2.57782	0.0124375	0.499459	-3.06971
PCSK5	0.256522	0.121212	2.57782	0.0124375	0.499459	-3.06971
ADAMTS4	0.2	0.0606061	2.50181	0.0151244	0.499459	-3.18137
GPR111	0.2	0.0606061	2.50181	0.0151244	0.499459	-3.18137
THSD7A	0.2	0.0606061	2.50181	0.0151244	0.499459	-3.18137
IL1RAPL2	0.2	0.0606061	2.50181	0.0151244	0.499459	-3.18137
CAPN9	0.2	0.0606061	2.50181	0.0151244	0.499459	-3.18137
TRIP11	0.2	0.0606061	2.50181	0.0151244	0.499459	-3.18137
NUTM1	0.2	0.0606061	2.50181	0.0151244	0.499459	-3.18137
CAPN15	0.2	0.0606061	2.50181	0.0151244	0.499459	-3.18137
ZNF749	0.2	0.0606061	2.50181	0.0151244	0.499459	-3.18137
CPEB4	0.2	0.0606061	2.50181	0.0151244	0.499459	-3.18137
UBE3D	0.2	0.0606061	2.50181	0.0151244	0.499459	-3.18137
CHD5	0.2	0.0606061	2.50181	0.0151244	0.499459	-3.18137
NT5C1A	0.2	0.0606061	2.50181	0.0151244	0.499459	-3.18137
MYO9A	0.2	0.0606061	2.50181	0.0151244	0.499459	-3.18137
SYT4	0.2	0.0606061	2.50181	0.0151244	0.499459	-3.18137
ADAMTS16	0.2	0.0606061	2.50181	0.0151244	0.499459	-3.18137
MAP1B	0.2	0.0606061	2.50181	0.0151244	0.499459	-3.18137
PKD1L1	0.2	0.0606061	2.50181	0.0151244	0.499459	-3.18137
VIPR2	0.2	0.0606061	2.50181	0.0151244	0.499459	-3.18137
KIAA2022	0.2	0.0606061	2.50181	0.0151244	0.499459	-3.18137
AMY2B	0.2	0.0606061	2.50181	0.0151244	0.499459	-3.18137
DNM3	0.2	0.0606061	2.50181	0.0151244	0.499459	-3.18137
ZSCAN29	0.2	0.0606061	2.50181	0.0151244	0.499459	-3.18137
USP8	0.2	0.0606061	2.50181	0.0151244	0.499459	-3.18137
COBLL1	0.2	0.0606061	2.50181	0.0151244	0.499459	-3.18137
BOD1L1	0.2	0.0606061	2.50181	0.0151244	0.499459	-3.18137
BDP1	0.2	0.0606061	2.50181	0.0151244	0.499459	-3.18137
FKBP5	0.2	0.0606061	2.50181	0.0151244	0.499459	-3.18137
NIPAL2	0.2	0.0606061	2.50181	0.0151244	0.499459	-3.18137
SIPA1L1	0.2	0.0606061	2.50181	0.0151244	0.499459	-3.18137
COL9A1	0.2	0.0606061	2.50181	0.0151244	0.499459	-3.18137
NACAD	0.2	0.0606061	2.50181	0.0151244	0.499459	-3.18137
IQUB	0.2	0.0606061	2.50181	0.0151244	0.499459	-3.18137
HSPG2	0.2	0.0606061	2.50181	0.0151244	0.499459	-3.18137
PDE4DIP	0.2	0.0606061	2.50181	0.0151244	0.499459	-3.18137
ARHGEF11	0.2	0.0606061	2.50181	0.0151244	0.499459	-3.18137
ZNF488	0.2	0.0606061	2.50181	0.0151244	0.499459	-3.18137
OPN4	0.2	0.0606061	2.50181	0.0151244	0.499459	-3.18137
EHBP1L1	0.2	0.0606061	2.50181	0.0151244	0.499459	-3.18137
FGD6	0.2	0.0606061	2.50181	0.0151244	0.499459	-3.18137
TEP1	0.2	0.0606061	2.50181	0.0151244	0.499459	-3.18137
LRR1	0.2	0.0606061	2.50181	0.0151244	0.499459	-3.18137
MAP3K9	0.2	0.0606061	2.50181	0.0151244	0.499459	-3.18137
PRDM7	0.2	0.0606061	2.50181	0.0151244	0.499459	-3.18137
SPEG	0.2	0.0606061	2.50181	0.0151244	0.499459	-3.18137
BPI	0.2	0.0606061	2.50181	0.0151244	0.499459	-3.18137
TAF8	0.2	0.0606061	2.50181	0.0151244	0.499459	-3.18137
ETV1	0.2	0.0606061	2.50181	0.0151244	0.499459	-3.18137
VPS13B	0.2	0.0606061	2.50181	0.0151244	0.499459	-3.18137
MPDZ	0.2	0.0606061	2.50181	0.0151244	0.499459	-3.18137
MAGED1	0.2	0.0606061	2.50181	0.0151244	0.499459	-3.18137
ZMYM1	0.2	0.0606061	2.50181	0.0151244	0.499459	-3.18137
MICAL2	0.2	0.0606061	2.50181	0.0151244	0.499459	-3.18137
ZNF770	0.2	0.0606061	2.50181	0.0151244	0.499459	-3.18137
TBC1D2B	0.2	0.0606061	2.50181	0.0151244	0.499459	-3.18137
ZFP30	0.2	0.0606061	2.50181	0.0151244	0.499459	-3.18137
CIR1	0.2	0.0606061	2.50181	0.0151244	0.499459	-3.18137
SPO11	0.2	0.0606061	2.50181	0.0151244	0.499459	-3.18137
TM4SF4	0.2	0.0606061	2.50181	0.0151244	0.499459	-3.18137
KIAA1239	0.2	0.0606061	2.50181	0.0151244	0.499459	-3.18137
MYO10	0.2	0.0606061	2.50181	0.0151244	0.499459	-3.18137
MAN2A1	0.2	0.0606061	2.50181	0.0151244	0.499459	-3.18137
APC	0.2	0.0606061	2.50181	0.0151244	0.499459	-3.18137
ZNF479	0.2	0.0606061	2.50181	0.0151244	0.499459	-3.18137
TP53I13	0.2	0.0606061	2.50181	0.0151244	0.499459	-3.18137
ZNF548	0.2	0.0606061	2.50181	0.0151244	0.499459	-3.18137
DUSP19	0.2	0.0606061	2.50181	0.0151244	0.499459	-3.18137
SKIL	0.2	0.0606061	2.50181	0.0151244	0.499459	-3.18137
ZNF879	0.2	0.0606061	2.50181	0.0151244	0.499459	-3.18137
OR2F1	0.2	0.0606061	2.50181	0.0151244	0.499459	-3.18137
WDR6	0.2	0.0606061	2.50181	0.0151244	0.499459	-3.18137
ERV3-1	0.2	0.0606061	2.50181	0.0151244	0.499459	-3.18137
KDM4A	0.2	0.0606061	2.50181	0.0151244	0.499459	-3.18137
CCKBR	0.2	0.0606061	2.50181	0.0151244	0.499459	-3.18137
CYB5R1	0.2	0.0606061	2.50181	0.0151244	0.499459	-3.18137
PTPRC	0.2	0.0606061	2.50181	0.0151244	0.499459	-3.18137
FAM83D	0.2	0.0606061	2.50181	0.0151244	0.499459	-3.18137
COQ2	0.2	0.0606061	2.50181	0.0151244	0.499459	-3.18137
EGFLAM	0.2	0.0606061	2.50181	0.0151244	0.499459	-3.18137
C10orf112	0.2	0.0606061	2.50181	0.0151244	0.499459	-3.18137
STAB2	0.2	0.0606061	2.50181	0.0151244	0.499459	-3.18137
NGRN	0.2	0.0606061	2.50181	0.0151244	0.499459	-3.18137
KCNB1	0.2	0.0606061	2.50181	0.0151244	0.499459	-3.18137
SLC1A3	0.2	0.0606061	2.50181	0.0151244	0.499459	-3.18137
PLXNC1	0.2	0.0606061	2.50181	0.0151244	0.499459	-3.18137
MKX	0.2	0.0606061	2.50181	0.0151244	0.499459	-3.18137
TNKS1BP1	0.2	0.0606061	2.50181	0.0151244	0.499459	-3.18137
SNX19	0.2	0.0606061	2.50181	0.0151244	0.499459	-3.18137
FBRS	0.2	0.0606061	2.50181	0.0151244	0.499459	-3.18137
DHX58	0.2	0.0606061	2.50181	0.0151244	0.499459	-3.18137
LAMA5	0.2	0.0606061	2.50181	0.0151244	0.499459	-3.18137
KHDRBS2	0.2	0.0606061	2.50181	0.0151244	0.499459	-3.18137
LANCL2	0.2	0.0606061	2.50181	0.0151244	0.499459	-3.18137
TSC1	0.2	0.0606061	2.50181	0.0151244	0.499459	-3.18137
ALMS1	-0.217391	0.151515	-1.98719	0.0515096	0.499459	-3.86866
ST18	0.213043	0.151515	1.9449	0.0565174	0.499459	-3.91946
AHNAK2	0.213043	0.151515	1.9449	0.0565174	0.499459	-3.91946
CDKN2A	0.213043	0.151515	1.9449	0.0565174	0.499459	-3.91946
LRRIQ1	0.213043	0.151515	1.9449	0.0565174	0.499459	-3.91946
MYO18B	0.213043	0.151515	1.9449	0.0565174	0.499459	-3.91946
MUC16	-0.265217	0.484848	-1.82051	0.0737114	0.499459	-4.06349
TTN	-0.23913	0.666667	-1.7234	0.0900086	0.499459	-4.17024
GNAS	-0.173913	0.121212	-1.69722	0.0948793	0.499459	-4.19815
PEG3	-0.173913	0.121212	-1.69722	0.0948793	0.499459	-4.19815
PREX2	-0.173913	0.121212	-1.69722	0.0948793	0.499459	-4.19815
AHNAK	-0.173913	0.121212	-1.69722	0.0948793	0.499459	-4.19815
LRRK2	-0.173913	0.121212	-1.69722	0.0948793	0.499459	-4.19815
CALCR	-0.173913	0.121212	-1.69722	0.0948793	0.499459	-4.19815
NCOA2	-0.173913	0.121212	-1.69722	0.0948793	0.499459	-4.19815
FER1L6	-0.173913	0.121212	-1.69722	0.0948793	0.499459	-4.19815
TNS1	-0.173913	0.121212	-1.69722	0.0948793	0.499459	-4.19815
CARS2	-0.173913	0.121212	-1.69722	0.0948793	0.499459	-4.19815
EEA1	0.156522	0.0909091	1.67839	0.0985164	0.499459	-4.218
PXDN	0.156522	0.0909091	1.67839	0.0985164	0.499459	-4.218
SYNE1	0.156522	0.0909091	1.67839	0.0985164	0.499459	-4.218
MKI67	0.156522	0.0909091	1.67839	0.0985164	0.499459	-4.218
MMP16	0.156522	0.0909091	1.67839	0.0985164	0.499459	-4.218
FZD10	0.156522	0.0909091	1.67839	0.0985164	0.499459	-4.218
FOXN3	0.156522	0.0909091	1.67839	0.0985164	0.499459	-4.218
PCDHA13	0.156522	0.0909091	1.67839	0.0985164	0.499459	-4.218
EIF3CL	0.156522	0.0909091	1.67839	0.0985164	0.499459	-4.218
PTPRS	0.156522	0.0909091	1.67839	0.0985164	0.499459	-4.218
RBBP6	0.156522	0.0909091	1.67839	0.0985164	0.499459	-4.218
SYNPO2	0.156522	0.0909091	1.67839	0.0985164	0.499459	-4.218
HERC2	0.156522	0.0909091	1.67839	0.0985164	0.499459	-4.218
SPAG5	0.156522	0.0909091	1.67839	0.0985164	0.499459	-4.218
LTBP4	0.156522	0.0909091	1.67839	0.0985164	0.499459	-4.218
SCN2A	0.156522	0.0909091	1.67839	0.0985164	0.499459	-4.218
DNAH8	0.156522	0.0909091	1.67839	0.0985164	0.499459	-4.218
CACNA2D1	0.156522	0.0909091	1.67839	0.0985164	0.499459	-4.218
PLCE1	0.156522	0.0909091	1.67839	0.0985164	0.499459	-4.218
ADAMTS7	0.156522	0.0909091	1.67839	0.0985164	0.499459	-4.218
LEPR	0.156522	0.0909091	1.67839	0.0985164	0.499459	-4.218
OBSL1	0.156522	0.0909091	1.67839	0.0985164	0.499459	-4.218
STAB1	0.156522	0.0909091	1.67839	0.0985164	0.499459	-4.218
RELN	0.156522	0.0909091	1.67839	0.0985164	0.499459	-4.218
ARHGEF5	0.156522	0.0909091	1.67839	0.0985164	0.499459	-4.218
BNC1	0.156522	0.0909091	1.67839	0.0985164	0.499459	-4.218
TNRC18	0.156522	0.0909091	1.67839	0.0985164	0.499459	-4.218
AMDHD2	0.156522	0.0909091	1.67839	0.0985164	0.499459	-4.218
PKHD1L1	0.156522	0.0909091	1.67839	0.0985164	0.499459	-4.218
SORL1	0.156522	0.0909091	1.67839	0.0985164	0.499459	-4.218
PLA2G4D	0.156522	0.0909091	1.67839	0.0985164	0.499459	-4.218
FSD1	0.156522	0.0909091	1.67839	0.0985164	0.499459	-4.218
MECOM	0.156522	0.0909091	1.67839	0.0985164	0.499459	-4.218
DDX46	0.156522	0.0909091	1.67839	0.0985164	0.499459	-4.218
ATP8B3	0.156522	0.0909091	1.67839	0.0985164	0.499459	-4.218
UBR5	0.156522	0.0909091	1.67839	0.0985164	0.499459	-4.218
UNC5A	0.156522	0.0909091	1.67839	0.0985164	0.499459	-4.218
FES	0.156522	0.0909091	1.67839	0.0985164	0.499459	-4.218
PEX2	0.156522	0.0909091	1.67839	0.0985164	0.499459	-4.218
VPS13C	0.156522	0.0909091	1.67839	0.0985164	0.499459	-4.218
NBPF20	0.156522	0.0909091	1.67839	0.0985164	0.499459	-4.218
ARHGAP30	0.156522	0.0909091	1.67839	0.0985164	0.499459	-4.218
C14orf80	0.156522	0.0909091	1.67839	0.0985164	0.499459	-4.218
KIAA1109	0.156522	0.0909091	1.67839	0.0985164	0.499459	-4.218
ADAMTS17	0.156522	0.0909091	1.67839	0.0985164	0.499459	-4.218
MYO3A	0.156522	0.0909091	1.67839	0.0985164	0.499459	-4.218
SVIL	0.156522	0.0909091	1.67839	0.0985164	0.499459	-4.218
PEPD	0.156522	0.0909091	1.67839	0.0985164	0.499459	-4.218
DOPEY1	0.156522	0.0909091	1.67839	0.0985164	0.499459	-4.218
ZNF618	0.156522	0.0909091	1.67839	0.0985164	0.499459	-4.218

## Sheet: table5_CNVs
Gene	logFC	AveExpr	t	P.Value	adj.P.Val	B	Cytoband
ITPR2	0.569565	0.30303	4.06127	0.000242903	0.703445	-1.5679	12p11.23
PPFIBP1	0.513043	0.242424	3.84548	0.000457486	0.703445	-1.84179	12p11.23-p11.22
REP15	0.513043	0.242424	3.84548	0.000457486	0.703445	-1.84179	12p11.22
MRPS35	0.513043	0.242424	3.84548	0.000457486	0.703445	-1.84179	12p11.22
MANSC4	0.513043	0.242424	3.84548	0.000457486	0.703445	-1.84179	12p11.22
KLHL42	0.513043	0.242424	3.84548	0.000457486	0.703445	-1.84179	12p11.22
PTHLH	0.513043	0.242424	3.84548	0.000457486	0.703445	-1.84179	12p11.22
LOC729291	0.513043	0.242424	3.84548	0.000457486	0.703445	-1.84179	12p11.22
CCDC91	0.513043	0.242424	3.84548	0.000457486	0.703445	-1.84179	12p11.22
IPO8	0.456522	0.181818	3.75009	0.000603056	0.703445	-1.96238	12p11.21
CAPRIN2	0.456522	0.181818	3.75009	0.000603056	0.703445	-1.96238	12p11.21
LOC645485	0.456522	0.181818	3.75009	0.000603056	0.703445	-1.96238	12p11.21
LINC00941	0.456522	0.181818	3.75009	0.000603056	0.703445	-1.96238	12p11.21
MIR4302	0.526087	0.333333	3.51808	0.00116863	0.703445	-2.25356	12p12.1
RASSF8-AS1	0.526087	0.333333	3.51808	0.00116863	0.703445	-2.25356	12p12.1
RASSF8	0.526087	0.333333	3.51808	0.00116863	0.703445	-2.25356	12p12.1
BHLHE41	0.526087	0.333333	3.51808	0.00116863	0.703445	-2.25356	12p12.1
SSPN	0.526087	0.333333	3.51808	0.00116863	0.703445	-2.25356	12p12.1
ARNTL2	0.469565	0.272727	3.25352	0.00243478	0.703445	-2.58012	12p11.23
ARNTL2-AS1	0.469565	0.272727	3.25352	0.00243478	0.703445	-2.58012	12p11.23
SMCO2	0.469565	0.272727	3.25352	0.00243478	0.703445	-2.58012	12p11.23
C12orf77	0.482609	0.363636	3.06961	0.00399738	0.703445	-2.80236	12p12.1
LOC645177	0.482609	0.363636	3.06961	0.00399738	0.703445	-2.80236	12p12.1
LRMP	0.482609	0.363636	3.06961	0.00399738	0.703445	-2.80236	12p12.1
CASC1	0.482609	0.363636	3.06961	0.00399738	0.703445	-2.80236	12p12.1
ETFRF1	0.482609	0.363636	3.06961	0.00399738	0.703445	-2.80236	12p12.1
KRAS	0.482609	0.363636	3.06961	0.00399738	0.703445	-2.80236	12p12.1
LMNTD1	0.482609	0.363636	3.06961	0.00399738	0.703445	-2.80236	12p12.1
TMTC1	0.413044	0.212121	3.0628	0.00407038	0.703445	-2.81049	12p11.22
SYT10	0.413044	0.212121	3.0628	0.00407038	0.703445	-2.81049	12p11.1
C2CD5	0.413044	0.212121	3.0628	0.00407038	0.703445	-2.81049	12p12.1
LOC105369691	0.413044	0.212121	3.0628	0.00407038	0.703445	-2.81049	12p12.1
ETNK1	0.413044	0.212121	3.0628	0.00407038	0.703445	-2.81049	12p12.1
TSPAN11	0.356522	0.151515	2.96767	0.00523205	0.703445	-2.92344	12p11.21
HGSNAT	-0.46087	0.121212	-2.92636	0.00582798	0.703445	-2.97202	8p11.21-p11.1
SOX5	0.426087	0.30303	2.77811	0.00853172	0.703445	-3.14388	12p12.1
INTS13	0.426087	0.30303	2.77811	0.00853172	0.703445	-3.14388	12p11.23
FGFR1OP2	0.426087	0.30303	2.77811	0.00853172	0.703445	-3.14388	12p11.23
TM7SF3	0.426087	0.30303	2.77811	0.00853172	0.703445	-3.14388	12p11.23
MED21	0.426087	0.30303	2.77811	0.00853172	0.703445	-3.14388	12p11.23
C12orf71	0.426087	0.30303	2.77811	0.00853172	0.703445	-3.14388	12p11.23
STK38L	0.426087	0.30303	2.77811	0.00853172	0.703445	-3.14388	12p11.23
POTEA	-0.417391	0.0909091	-2.7653	0.00881333	0.703445	-3.15854	8p11.1
BCAT1	0.43913	0.393939	2.68548	0.0107718	0.703445	-3.24909	12p12.1
LINC00477	0.43913	0.393939	2.68548	0.0107718	0.703445	-3.24909	12p12.1
TENM3	-0.373913	0.0606061	-2.61627	0.0127885	0.703445	-3.32653	4q34.3-q35.1
KCNU1	-0.373913	0.0606061	-2.61627	0.0127885	0.703445	-3.32653	8p11.23
LOC101928441	0.369565	0.242424	2.53717	0.0155155	0.703445	-3.4137	12p12.1
FAR2	0.369565	0.242424	2.53717	0.0155155	0.703445	-3.4137	12p11.22
LOC100506606	0.369565	0.242424	2.53717	0.0155155	0.703445	-3.4137	12p11.22
ERGIC2	0.369565	0.242424	2.53717	0.0155155	0.703445	-3.4137	12p11.22
OVCH1-AS1	0.369565	0.242424	2.53717	0.0155155	0.703445	-3.4137	12p11.22
OVCH1	0.369565	0.242424	2.53717	0.0155155	0.703445	-3.4137	12p11.22
ALG10	0.369565	0.242424	2.53717	0.0155155	0.703445	-3.4137	12p11.1
ZMAT4	-0.330435	0.030303	-2.48145	0.0177459	0.703445	-3.47422	8p11.21
ANK1	-0.330435	0.030303	-2.48145	0.0177459	0.703445	-3.47422	8p11.21
KAT6A	-0.330435	0.030303	-2.48145	0.0177459	0.703445	-3.47422	8p11.21
LOC105379393	-0.330435	0.030303	-2.48145	0.0177459	0.703445	-3.47422	8p11.21
MIR920	0.382609	0.333333	2.37832	0.0226592	0.703445	-3.58417	12p12.1
SOX5-AS1	0.382609	0.333333	2.37832	0.0226592	0.703445	-3.58417	12p12.1
ANKRD30BP2	-0.382609	-0.333333	-2.37832	0.0226592	0.703445	-3.58417	21q11.2
FRG1FP	-0.343478	-0.0606061	-2.36938	0.0231384	0.703445	-3.59357	22p11.2
OR11H1	-0.343478	-0.0606061	-2.36938	0.0231384	0.703445	-3.59357	22q11.1
TRIM51HP	0.343478	0.0606061	2.36938	0.0231384	0.703445	-3.59357	11q11
NEFL	-0.286957	0	-2.36663	0.0232878	0.703445	-3.59646	8p21.2
MIR6841	-0.286957	0	-2.36663	0.0232878	0.703445	-3.59646	8p21.2
DOCK5	-0.286957	0	-2.36663	0.0232878	0.703445	-3.59646	8p21.2
MIR6876	-0.286957	0	-2.36663	0.0232878	0.703445	-3.59646	8p21.2
GNRH1	-0.286957	0	-2.36663	0.0232878	0.703445	-3.59646	8p21.2
KCTD9	-0.286957	0	-2.36663	0.0232878	0.703445	-3.59646	8p21.2
NUGGC	-0.286957	0	-2.36663	0.0232878	0.703445	-3.59646	8p21.1
KIF13B	-0.286957	0	-2.36663	0.0232878	0.703445	-3.59646	8p12
IDO1	-0.286957	0	-2.36663	0.0232878	0.703445	-3.59646	8p11.21
IDO2	-0.286957	0	-2.36663	0.0232878	0.703445	-3.59646	8p11.21
TCIM	-0.286957	0	-2.36663	0.0232878	0.703445	-3.59646	8p11.21
SFRP1	-0.286957	0	-2.36663	0.0232878	0.703445	-3.59646	8p11.21
MIR548AO	-0.286957	0	-2.36663	0.0232878	0.703445	-3.59646	8p11.21
SNORD65B	-0.286957	0	-2.36663	0.0232878	0.703445	-3.59646	8p11.21
GOLGA7	-0.286957	0	-2.36663	0.0232878	0.703445	-3.59646	8p11.21
GINS4	-0.286957	0	-2.36663	0.0232878	0.703445	-3.59646	8p11.21
LOC102723729	-0.286957	0	-2.36663	0.0232878	0.703445	-3.59646	8p11.21
GPAT4	-0.286957	0	-2.36663	0.0232878	0.703445	-3.59646	8p11.21
NKX6-3	-0.286957	0	-2.36663	0.0232878	0.703445	-3.59646	8p11.21
MIR486-1	-0.286957	0	-2.36663	0.0232878	0.703445	-3.59646	8p11.21
MIR486-2	-0.286957	0	-2.36663	0.0232878	0.703445	-3.59646	8p11.21
AP3M2	-0.286957	0	-2.36663	0.0232878	0.703445	-3.59646	8p11.21
PLAT	-0.286957	0	-2.36663	0.0232878	0.703445	-3.59646	8p11.21
LOC101929897	-0.286957	0	-2.36663	0.0232878	0.703445	-3.59646	8p11.21
IKBKB	-0.286957	0	-2.36663	0.0232878	0.703445	-3.59646	8p11.21
POLB	-0.286957	0	-2.36663	0.0232878	0.703445	-3.59646	8p11.21
DKK4	-0.286957	0	-2.36663	0.0232878	0.703445	-3.59646	8p11.21
VDAC3	-0.286957	0	-2.36663	0.0232878	0.703445	-3.59646	8p11.21
SLC20A2	-0.286957	0	-2.36663	0.0232878	0.703445	-3.59646	8p11.21
SMIM19	-0.286957	0	-2.36663	0.0232878	0.703445	-3.59646	8p11.21
LINC02069	-0.347826	0.242424	-2.36459	0.0233992	0.703445	-3.59861	3q27.1
CEBPD	-0.347826	0.242424	-2.36459	0.0233992	0.703445	-3.59861	8q11.21
PRKDC	-0.347826	0.242424	-2.36459	0.0233992	0.703445	-3.59861	8q11.21
CHD7	-0.347826	0.242424	-2.36459	0.0233992	0.703445	-3.59861	8q12.2
LOC100130298	-0.347826	0.242424	-2.36459	0.0233992	0.703445	-3.59861	8q12.2
VWA5A	0.313043	0.181818	2.3464	0.0244129	0.703445	-3.61765	11q24.2
OR10D3	0.313043	0.181818	2.3464	0.0244129	0.703445	-3.61765	11q24.2
OR8G2P	0.313043	0.181818	2.3464	0.0244129	0.703445	-3.61765	11q24.2
OR8G1	0.313043	0.181818	2.3464	0.0244129	0.703445	-3.61765	11q24.2
OR8G5	0.313043	0.181818	2.3464	0.0244129	0.703445	-3.61765	11q24.2
OR8D1	0.313043	0.181818	2.3464	0.0244129	0.703445	-3.61765	11q24.2
OR8D2	0.313043	0.181818	2.3464	0.0244129	0.703445	-3.61765	11q24.2
OR8B2	0.313043	0.181818	2.3464	0.0244129	0.703445	-3.61765	11q24.2
OR8B3	0.313043	0.181818	2.3464	0.0244129	0.703445	-3.61765	11q24.2
OR8B4	0.313043	0.181818	2.3464	0.0244129	0.703445	-3.61765	11q24.2
OR8B8	0.313043	0.181818	2.3464	0.0244129	0.703445	-3.61765	11q24.2
OR8B12	0.313043	0.181818	2.3464	0.0244129	0.703445	-3.61765	11q24.2
OR8A1	0.313043	0.181818	2.3464	0.0244129	0.703445	-3.61765	11q24.2
PANX3	0.313043	0.181818	2.3464	0.0244129	0.703445	-3.61765	11q24.2
TBRG1	0.313043	0.181818	2.3464	0.0244129	0.703445	-3.61765	11q24.2
SIAE	0.313043	0.181818	2.3464	0.0244129	0.703445	-3.61765	11q24.2
SPA17	0.313043	0.181818	2.3464	0.0244129	0.703445	-3.61765	11q24.2
NRGN	0.313043	0.181818	2.3464	0.0244129	0.703445	-3.61765	11q24.2
VSIG2	0.313043	0.181818	2.3464	0.0244129	0.703445	-3.61765	11q24.2
ESAM	0.313043	0.181818	2.3464	0.0244129	0.703445	-3.61765	11q24.2
LOC101929340	0.313043	0.181818	2.3464	0.0244129	0.703445	-3.61765	11q24.2
MSANTD2	0.313043	0.181818	2.3464	0.0244129	0.703445	-3.61765	11q24.2
LOC100507283	0.313043	0.181818	2.3464	0.0244129	0.703445	-3.61765	11q24.2
ROBO3	0.313043	0.181818	2.3464	0.0244129	0.703445	-3.61765	11q24.2
ROBO4	0.313043	0.181818	2.3464	0.0244129	0.703445	-3.61765	11q24.2
HEPN1	0.313043	0.181818	2.3464	0.0244129	0.703445	-3.61765	11q24.2
HEPACAM	0.313043	0.181818	2.3464	0.0244129	0.703445	-3.61765	11q24.2
CCDC15	0.313043	0.181818	2.3464	0.0244129	0.703445	-3.61765	11q24.2
SLC37A2	0.313043	0.181818	2.3464	0.0244129	0.703445	-3.61765	11q24.2
TMEM218	0.313043	0.181818	2.3464	0.0244129	0.703445	-3.61765	11q24.2
PKNOX2-AS1	0.313043	0.181818	2.3464	0.0244129	0.703445	-3.61765	11q24.2
PKNOX2	0.313043	0.181818	2.3464	0.0244129	0.703445	-3.61765	11q24.2
FEZ1	0.313043	0.181818	2.3464	0.0244129	0.703445	-3.61765	11q24.2
SLCO1B1	0.313043	0.181818	2.3464	0.0244129	0.703445	-3.61765	12p12.1
SLCO1A2	0.313043	0.181818	2.3464	0.0244129	0.703445	-3.61765	12p12.1
IAPP	0.313043	0.181818	2.3464	0.0244129	0.703445	-3.61765	12p12.1
PYROXD1	0.313043	0.181818	2.3464	0.0244129	0.703445	-3.61765	12p12.1
RECQL	0.313043	0.181818	2.3464	0.0244129	0.703445	-3.61765	12p12.1
GOLT1B	0.313043	0.181818	2.3464	0.0244129	0.703445	-3.61765	12p12.1
SPX	0.313043	0.181818	2.3464	0.0244129	0.703445	-3.61765	12p12.1
GYS2	0.313043	0.181818	2.3464	0.0244129	0.703445	-3.61765	12p12.1
LDHB	0.313043	0.181818	2.3464	0.0244129	0.703445	-3.61765	12p12.1
KCNJ8	0.313043	0.181818	2.3464	0.0244129	0.703445	-3.61765	12p12.1
ABCC9	0.313043	0.181818	2.3464	0.0244129	0.703445	-3.61765	12p12.1
CMAS	0.313043	0.181818	2.3464	0.0244129	0.703445	-3.61765	12p12.1
ST8SIA1	0.313043	0.181818	2.3464	0.0244129	0.703445	-3.61765	12p12.1
DENND5B-AS1	0.313043	0.181818	2.3464	0.0244129	0.703445	-3.61765	12p11.21
ETFBKMT	0.313043	0.181818	2.3464	0.0244129	0.703445	-3.61765	12p11.21
AMN1	0.313043	0.181818	2.3464	0.0244129	0.703445	-3.61765	12p11.21
H3-5	0.313043	0.181818	2.3464	0.0244129	0.703445	-3.61765	12p11.21
LINC02422	0.313043	0.181818	2.3464	0.0244129	0.703445	-3.61765	12p11.21
RESF1	0.313043	0.181818	2.3464	0.0244129	0.703445	-3.61765	12p11.21
BICD1	0.313043	0.181818	2.3464	0.0244129	0.703445	-3.61765	12p11.21
FGD4	0.313043	0.181818	2.3464	0.0244129	0.703445	-3.61765	12p11.21
DNM1L	0.313043	0.181818	2.3464	0.0244129	0.703445	-3.61765	12p11.21
YARS2	0.313043	0.181818	2.3464	0.0244129	0.703445	-3.61765	12p11.21
PKP2	0.313043	0.181818	2.3464	0.0244129	0.703445	-3.61765	12p11.21
LINC01986	0.2	0.0606061	2.28947	0.0278458	0.703445	-3.67664	3p26.3
CHL1-AS2	0.2	0.0606061	2.28947	0.0278458	0.703445	-3.67664	3p26.3
CHL1	0.2	0.0606061	2.28947	0.0278458	0.703445	-3.67664	3p26.3
CHL1-AS1	0.2	0.0606061	2.28947	0.0278458	0.703445	-3.67664	3p26.3
LINC01266	0.2	0.0606061	2.28947	0.0278458	0.703445	-3.67664	3p26.3
CNTN6	0.2	0.0606061	2.28947	0.0278458	0.703445	-3.67664	3p26.3
CNTN4	0.2	0.0606061	2.28947	0.0278458	0.703445	-3.67664	3p26.3-p26.2
CNTN4-AS2	0.2	0.0606061	2.28947	0.0278458	0.703445	-3.67664	3p26.3
TRNT1	0.2	0.0606061	2.28947	0.0278458	0.703445	-3.67664	3p26.2
CRBN	0.2	0.0606061	2.28947	0.0278458	0.703445	-3.67664	3p26.2
LOC100130207	0.2	0.0606061	2.28947	0.0278458	0.703445	-3.67664	3p26.2
LRRN1	0.2	0.0606061	2.28947	0.0278458	0.703445	-3.67664	3p26.2
MMP23A	0.2	0.0606061	2.28947	0.0278458	0.703445	-3.67664	1p36.33
NBPF8	0.2	0.0606061	2.28947	0.0278458	0.703445	-3.67664	1p11.2
PFN1P2	0.2	0.0606061	2.28947	0.0278458	0.703445	-3.67664	1p11.2
LOC100996724	0.2	0.0606061	2.28947	0.0278458	0.703445	-3.67664	1p11.2
NBPF26	0.2	0.0606061	2.28947	0.0278458	0.703445	-3.67664	1p11.2
RNVU1-19	0.2	0.0606061	2.28947	0.0278458	0.703445	-3.67664	1p11.2
PPIAL4A	0.2	0.0606061	2.28947	0.0278458	0.703445	-3.67664	1p11.2
LINC00623	0.2	0.0606061	2.28947	0.0278458	0.703445	-3.67664	1p11.2
RNVU1-20	0.2	0.0606061	2.28947	0.0278458	0.703445	-3.67664	1q21.2
RNVU1-4	0.2	0.0606061	2.28947	0.0278458	0.703445	-3.67664	1p11.2
LOC101929798	0.2	0.0606061	2.28947	0.0278458	0.703445	-3.67664	1p11.2
FCGR1B	0.2	0.0606061	2.28947	0.0278458	0.703445	-3.67664	1p11.2
H2BP1	0.2	0.0606061	2.28947	0.0278458	0.703445	-3.67664	1p11.2
FAM72B	0.2	0.0606061	2.28947	0.0278458	0.703445	-3.67664	1p11.2
SRGAP2C	0.2	0.0606061	2.28947	0.0278458	0.703445	-3.67664	1p11.2
EMBP1	0.2	0.0606061	2.28947	0.0278458	0.703445	-3.67664	1p11.2
FAT1	-0.2	-0.0606061	-2.28947	0.0278458	0.703445	-3.67664	4q35.2
LINC02374	-0.2	-0.0606061	-2.28947	0.0278458	0.703445	-3.67664	4q35.2
LOC339975	-0.2	-0.0606061	-2.28947	0.0278458	0.703445	-3.67664	4q35.2
LINC01262	-0.2	-0.0606061	-2.28947	0.0278458	0.703445	-3.67664	4q35.2
FRG1-DT	-0.2	-0.0606061	-2.28947	0.0278458	0.703445	-3.67664	4q35.2
LINC01596	-0.2	-0.0606061	-2.28947	0.0278458	0.703445	-3.67664	4q35.2
FRG1	-0.2	-0.0606061	-2.28947	0.0278458	0.703445	-3.67664	4q35.2
FRG2	-0.2	-0.0606061	-2.28947	0.0278458	0.703445	-3.67664	4q35.2
DBET	-0.2	-0.0606061	-2.28947	0.0278458	0.703445	-3.67664	4q35.2
NPM2	-0.2	-0.0606061	-2.28947	0.0278458	0.703445	-3.67664	8p21.3
FGF17	-0.2	-0.0606061	-2.28947	0.0278458	0.703445	-3.67664	8p21.3
DMTN	-0.2	-0.0606061	-2.28947	0.0278458	0.703445	-3.67664	8p21.3
FAM160B2	-0.2	-0.0606061	-2.28947	0.0278458	0.703445	-3.67664	8p21.3
SETD5	0.2	0.0606061	2.28947	0.0278458	0.703445	-3.67664	3p25.3
PLEKHA2	-0.243478	-0.030303	-2.28693	0.0280087	0.703445	-3.67925	8p11.22
HTRA4	-0.243478	-0.030303	-2.28693	0.0280087	0.703445	-3.67925	8p11.22
TM2D2	-0.243478	-0.030303	-2.28693	0.0280087	0.703445	-3.67925	8p11.22
ADAM9	-0.243478	-0.030303	-2.28693	0.0280087	0.703445	-3.67925	8p11.22
SNORD38D	-0.243478	-0.030303	-2.28693	0.0280087	0.703445	-3.67925	8p11.22
CHRNB3	-0.243478	-0.030303	-2.28693	0.0280087	0.703445	-3.67925	8p11.21
CHRNA6	-0.243478	-0.030303	-2.28693	0.0280087	0.703445	-3.67925	8p11.21
THAP1	-0.243478	-0.030303	-2.28693	0.0280087	0.703445	-3.67925	8p11.21
HOOK3	-0.243478	-0.030303	-2.28693	0.0280087	0.703445	-3.67925	8p11.21
FNTA	-0.243478	-0.030303	-2.28693	0.0280087	0.703445	-3.67925	8p11.21
POMK	-0.243478	-0.030303	-2.28693	0.0280087	0.703445	-3.67925	8p11.21
FAM90A10P	-0.256522	-0.121212	-2.22677	0.0321227	0.703445	-3.74056	8p23.1
SPAG11A	-0.256522	-0.121212	-2.22677	0.0321227	0.703445	-3.74056	8p23.1
DEFB4A	-0.256522	-0.121212	-2.22677	0.0321227	0.703445	-3.74056	8p23.1
ZNF705B	-0.256522	-0.121212	-2.22677	0.0321227	0.703445	-3.74056	8p23.1
FAM66E	-0.256522	-0.121212	-2.22677	0.0321227	0.703445	-3.74056	8p23.1
USP17L8	-0.256522	-0.121212	-2.22677	0.0321227	0.703445	-3.74056	8p23.1
USP17L3	-0.256522	-0.121212	-2.22677	0.0321227	0.703445	-3.74056	8p23.1
MIR548I3	-0.256522	-0.121212	-2.22677	0.0321227	0.703445	-3.74056	8p23.1
OR4A16	0.256522	0.121212	2.22677	0.0321227	0.703445	-3.74056	11q11
OR4A15	0.256522	0.121212	2.22677	0.0321227	0.703445	-3.74056	11q11
OR4C15	0.256522	0.121212	2.22677	0.0321227	0.703445	-3.74056	11q11
OR4C16	0.256522	0.121212	2.22677	0.0321227	0.703445	-3.74056	11q11
FEZF1	0.256522	0.121212	2.22677	0.0321227	0.703445	-3.74056	7q31.32
NAALADL2	-0.304348	0.212121	-2.13658	0.0393014	0.703445	-3.83047	3q26.31
ZBTB7C	0.304348	-0.212121	2.13658	0.0393014	0.703445	-3.83047	18q21.1
C18orf12	0.304348	-0.212121	2.13658	0.0393014	0.703445	-3.83047	18q21.1
CTIF	0.304348	-0.212121	2.13658	0.0393014	0.703445	-3.83047	18q21.1
MIR4743	0.304348	-0.212121	2.13658	0.0393014	0.703445	-3.83047	18q21.1
SMAD7	0.304348	-0.212121	2.13658	0.0393014	0.703445	-3.83047	18q21.1
ASNSP1	-0.304348	0.212121	-2.13658	0.0393014	0.703445	-3.83047	8q11.1
LINC00293	-0.304348	0.212121	-2.13658	0.0393014	0.703445	-3.83047	8q11.1
LOC100287846	-0.304348	0.212121	-2.13658	0.0393014	0.703445	-3.83047	8q11.1
SPIDR	-0.304348	0.212121	-2.13658	0.0393014	0.703445	-3.83047	8q11.21
OR2T35	0.326087	0.272727	2.10882	0.0417798	0.703445	-3.85764	1q44
OR2T27	0.326087	0.272727	2.10882	0.0417798	0.703445	-3.85764	1q44
CFAP300	0.326087	0.272727	2.10882	0.0417798	0.703445	-3.85764	11q22.1
YAP1	0.326087	0.272727	2.10882	0.0417798	0.703445	-3.85764	11q22.1
BIRC3	0.326087	0.272727	2.10882	0.0417798	0.703445	-3.85764	11q22.2
BIRC2	0.326087	0.272727	2.10882	0.0417798	0.703445	-3.85764	11q22.2
TMEM123	0.326087	0.272727	2.10882	0.0417798	0.703445	-3.85764	11q22.2
LOC101928424	0.326087	0.272727	2.10882	0.0417798	0.703445	-3.85764	11q22.2
LOC102723838	0.326087	0.272727	2.10882	0.0417798	0.703445	-3.85764	11q22.2
MMP7	0.326087	0.272727	2.10882	0.0417798	0.703445	-3.85764	11q22.2
MMP20	0.326087	0.272727	2.10882	0.0417798	0.703445	-3.85764	11q22.2
MMP27	0.326087	0.272727	2.10882	0.0417798	0.703445	-3.85764	11q22.2
LINC00290	-0.330435	0.030303	-2.07023	0.0454532	0.703445	-3.89501	4q34.3
LINC02500	-0.330435	0.030303	-2.07023	0.0454532	0.703445	-3.89501	4q34.3
TEMN3-AS1	-0.330435	0.030303	-2.07023	0.0454532	0.703445	-3.89501	4q34.3
TENM3-AS1	-0.330435	0.030303	-2.07023	0.0454532	0.703445	-3.89501	4q34.3
MIR1305	-0.330435	0.030303	-2.07023	0.0454532	0.703445	-3.89501	4q34.3
DCTD	-0.330435	0.030303	-2.07023	0.0454532	0.703445	-3.89501	4q35.1
FAM92A1P2	-0.330435	0.030303	-2.07023	0.0454532	0.703445	-3.89501	4q35.1
WWC2-AS2	-0.330435	0.030303	-2.07023	0.0454532	0.703445	-3.89501	4q35.1
WWC2	-0.330435	0.030303	-2.07023	0.0454532	0.703445	-3.89501	4q35.1
WWC2-AS1	-0.330435	0.030303	-2.07023	0.0454532	0.703445	-3.89501	4q35.1
CLDN22	-0.330435	0.030303	-2.07023	0.0454532	0.703445	-3.89501	4q35.1
CLDN24	-0.330435	0.030303	-2.07023	0.0454532	0.703445	-3.89501	4q35.1
FAM27E2	0.356522	0.151515	2.06111	0.0463619	0.703445	-3.90377	9p11.2
PRAMEF5	0.273913	-0.0909091	2.05797	0.0466785	0.703445	-3.90679	1p36.21
VPS8	-0.334783	0.333333	-2.04478	0.0480288	0.703445	-3.9194	3q27.2
MAOB	0.334783	-0.333333	2.04478	0.0480288	0.703445	-3.9194	Xp11.3
NDP	0.334783	-0.333333	2.04478	0.0480288	0.703445	-3.9194	Xp11.3
NDP-AS1	0.334783	-0.333333	2.04478	0.0480288	0.703445	-3.9194	NA
EFHC2	0.334783	-0.333333	2.04478	0.0480288	0.703445	-3.9194	Xp11.3
FUNDC1	0.334783	-0.333333	2.04478	0.0480288	0.703445	-3.9194	Xp11.3
CWF19L2	0.33913	0.363636	2.03031	0.0495492	0.703445	-3.93317	11q22.3
WASH8P	0.33913	0.363636	2.03031	0.0495492	0.703445	-3.93317	12p13.33
DUXAP8	-0.343478	-0.0606061	-2.02541	0.0500733	0.703445	-3.93782	22q11.1
ZNF826P	0.313043	0.181818	1.95868	0.0577084	0.703445	-4.00031	19p12
TBC1D3J	-0.417391	0.0909091	-1.94579	0.0592953	0.703445	-4.01222	17q12
GOLGA6L22	0.369565	0.242424	1.92898	0.061419	0.703445	-4.02765	15q11.2

## Sheet: table6_Cytobands
Cytoband	logFC	AveExpr	t	P.Value	adj.P.Val	B
12p11.23-p11.22	0.513043	0.242424	3.59464	0.00108782	0.75362	-3.96166
12p11.22	5.85217	3.12121	3.42862	0.00170291	0.75362	-4.00956
12p12.1	13.7565	9.21212	3.25245	0.00271791	0.75362	-4.06045
12p11.23	4.53478	2.93939	2.98683	0.00540303	0.75362	-4.1368
8p11.21-p11.1	-0.46087	0.121212	-2.72688	0.0103329	0.75362	-4.21039
12p11.1	0.782609	0.454545	2.72674	0.0103366	0.75362	-4.21043
8p11.1	-0.417391	0.0909091	-2.57862	0.0147776	0.75362	-4.25153
8p11.21	-9.49565	-0.181818	-2.49054	0.0181954	0.75362	-4.2756
4q34.3-q35.1	-0.373913	0.0606061	-2.4421	0.0203707	0.75362	-4.28869
8q12.2	-0.695652	0.484848	-2.36243	0.0244703	0.75362	-4.31001
1p11.2	2.8	0.848485	2.34812	0.0252817	0.75362	-4.3138
3p26.3	1.4	0.424242	2.34509	0.0254564	0.75362	-4.3146
3p26.3-p26.2	0.2	0.0606061	2.17271	0.0373974	0.75362	-4.35943
3p25.3	0.2	0.0606061	2.17271	0.0373974	0.75362	-4.35943
9q21.11	3.4087	-0.575758	2.15681	0.0387189	0.75362	-4.36348
11q11	3.38261	2.24242	2.08572	0.0451472	0.75362	-4.38139
11q24.2	19.2261	13	2.06838	0.046852	0.75362	-4.38571
8q11.1	-0.913044	0.636364	-2.0428	0.0494695	0.75362	-4.39205
4q34.3	-2.5913	-0.393939	-1.89823	0.0668107	0.75362	-4.42698
4q35.2	-3.34783	-1.66667	-1.86473	0.0715095	0.75362	-4.43485
12p11.21	5.68696	5.63636	1.86408	0.0716037	0.75362	-4.43501
22q11.1	-3.37391	1.15152	-1.86401	0.071613	0.75362	-4.43502
18q12.3	4.43478	-3.09091	1.84026	0.0751185	0.75362	-4.44055
3p26.2	1	0.30303	1.82506	0.0774369	0.75362	-4.44406
1p13.3	0.830435	0.121212	1.80007	0.0813817	0.75362	-4.4498
8p21.2	-5.52174	-2.15152	-1.79191	0.082707	0.75362	-4.45166
11q24.3	7.81739	6.15152	1.78947	0.0831066	0.75362	-4.45221
18q12.1-q12.2	0.26087	-0.181818	1.78679	0.0835477	0.75362	-4.45282
18q12.2-q12.3	0.26087	-0.181818	1.78679	0.0835477	0.75362	-4.45282
18q12.3-q21.1	0.26087	-0.181818	1.78679	0.0835477	0.75362	-4.45282
18q12.2	6.22174	-4.63636	1.75314	0.0892531	0.75362	-4.46042
15q24.3	-0.508696	0.454545	-1.75013	0.0897793	0.75362	-4.4611
11q24.3-q25	0.269565	0.212121	1.7431	0.0910191	0.75362	-4.46267
17p11.2	9.5	0.878788	1.71556	0.0960123	0.75362	-4.4688
11q22.2	4.01739	4	1.70064	0.0988107	0.75362	-4.47209
18q21.1	11	-9.66667	1.69795	0.0993244	0.75362	-4.47268
9q21.32	2.1913	0.272727	1.69403	0.100074	0.75362	-4.47354
9q33.1	1.47391	0.272727	1.69112	0.100633	0.75362	-4.47418
Xp22.2-p22.13	0.291304	-0.30303	1.67849	0.103095	0.75362	-4.47694
18q22.3	5.78696	-4.33333	1.67455	0.103871	0.75362	-4.4778
Xp22.13	4.15217	-4.39394	1.6679	0.105194	0.75362	-4.47924
9q31.3	2.41739	1.51515	1.66773	0.105229	0.75362	-4.47928
3q12.1	0.956522	0.333333	1.66072	0.10664	0.75362	-4.4808
8p11.22	-2.2913	0.69697	-1.64043	0.110812	0.75362	-4.48517
3q13.13	1.76957	0.666667	1.63749	0.111427	0.75362	-4.48579
9p12	0.843478	0.212121	1.63389	0.112185	0.75362	-4.48657
8q11.21	-1.78261	1.24242	-1.62945	0.113126	0.75362	-4.48752
15q24.1	0.943478	0.242424	1.6281	0.113413	0.75362	-4.4878
Xp22.2	15.5043	-16.6061	1.62168	0.114787	0.75362	-4.48917
2p24.3	1.10435	0.030303	1.60319	0.118819	0.75362	-4.49308
9q21.2	1.9	0.575758	1.60026	0.11947	0.75362	-4.4937
1p32.3	7.00435	2.81818	1.59567	0.120493	0.75362	-4.49467
3q26.31	-2.86957	2	-1.59454	0.120747	0.75362	-4.49491
9q22.31	3.75652	1.18182	1.59342	0.120998	0.75362	-4.49514
17q21.1	-3.65652	2.84848	-1.59004	0.121759	0.75362	-4.49585
1p31.3	5.18261	-0.212121	1.5875	0.122335	0.75362	-4.49638
4q35.1	-7.75652	-3.39394	-1.58372	0.123194	0.75362	-4.49717
4q22.1	-0.217391	0.151515	-1.57911	0.124247	0.75362	-4.49814
11q24.1	6.3913	5.54545	1.57395	0.125437	0.75362	-4.49921
11q22.1	2.93913	3.15152	1.56928	0.126522	0.75362	-4.50018
12q21.31	1.12609	0.515152	1.56919	0.126541	0.75362	-4.5002
6q21	4.7	1.42424	1.56598	0.127292	0.75362	-4.50087
10p13	-3.9	-1.18182	-1.56593	0.127303	0.75362	-4.50088
10p15.1	-3.7	-1.12121	-1.56591	0.127307	0.75362	-4.50088
1p33	3.7	1.12121	1.56591	0.127307	0.75362	-4.50088
10p14	-3.3	-1	-1.56587	0.127318	0.75362	-4.50089
3q13.2	3.1	0.939394	1.56584	0.127324	0.75362	-4.5009
15q26.1	2.6	0.787879	1.56574	0.127349	0.75362	-4.50092
6q22.1	2.6	0.787879	1.56574	0.127349	0.75362	-4.50092
11p11.2	2.4	0.727273	1.56568	0.127363	0.75362	-4.50093
3q13.31	2.4	0.727273	1.56568	0.127363	0.75362	-4.50093
12q14.3	2.3	0.69697	1.56564	0.127371	0.75362	-4.50094
10p15.3	-2	-0.606061	-1.5655	0.127405	0.75362	-4.50097
2p23.3	2	0.606061	1.5655	0.127405	0.75362	-4.50097
9q31.1	1.9	0.575758	1.56543	0.12742	0.75362	-4.50098
2p22.1	1.8	0.545455	1.56536	0.127437	0.75362	-4.501
9q21.33	1.8	0.545455	1.56536	0.127437	0.75362	-4.501
15q26.2	1.7	0.515152	1.56527	0.127458	0.75362	-4.50101
10p12.31	-1.6	-0.484848	-1.56517	0.127482	0.75362	-4.50104
1p12	1.5	0.454545	1.56504	0.127512	0.75362	-4.50106
1q31.2	1.5	0.454545	1.56504	0.127512	0.75362	-4.50106
3q12.3	1.5	0.454545	1.56504	0.127512	0.75362	-4.50106
9q22.2	1.5	0.454545	1.56504	0.127512	0.75362	-4.50106
12q22	1.4	0.424242	1.56489	0.127548	0.75362	-4.5011
6p24.2	1.4	0.424242	1.56489	0.127548	0.75362	-4.5011
9q22.1	1.4	0.424242	1.56489	0.127548	0.75362	-4.5011
1p32.1	1.3	0.393939	1.56469	0.127593	0.75362	-4.50113
11p12	1.3	0.393939	1.56469	0.127593	0.75362	-4.50113
12q14.2	1.2	0.363636	1.56445	0.127649	0.75362	-4.50118
1q31.3	1.2	0.363636	1.56445	0.127649	0.75362	-4.50118
12q21.1	1.1	0.333333	1.56414	0.127722	0.75362	-4.50125
1p32.2	1.1	0.333333	1.56414	0.127722	0.75362	-4.50125
3q13.12	1	0.30303	1.56374	0.127817	0.75362	-4.50133
15q13.1	0.9	0.272727	1.56319	0.127946	0.75362	-4.50145
1p31.1	0.9	0.272727	1.56319	0.127946	0.75362	-4.50145
3q13.32	0.9	0.272727	1.56319	0.127946	0.75362	-4.50145
11p11.12	0.8	0.242424	1.56242	0.128127	0.75362	-4.5016
3q12.2	0.7	0.212121	1.56131	0.12839	0.75362	-4.50184
9q31.2	0.7	0.212121	1.56131	0.12839	0.75362	-4.50184
10q24.32	0.7	0.212121	1.56131	0.12839	0.75362	-4.50184
11p14.2	0.717391	0	1.55995	0.128709	0.75362	-4.50212
10p15.2	-0.6	-0.181818	-1.55959	0.128795	0.75362	-4.50219
6p24.3	0.6	0.181818	1.55959	0.128795	0.75362	-4.50219
9p13.1	-0.6	-0.181818	-1.55959	0.128795	0.75362	-4.50219
1p21.3	0.5	0.151515	1.55676	0.129465	0.75362	-4.50278
6p24.1	0.4	0.121212	1.55159	0.130698	0.75362	-4.50384
6q22.32	0.4	0.121212	1.55159	0.130698	0.75362	-4.50384
12q15	3.63913	1.36364	1.54566	0.132122	0.75362	-4.50506
3q13.11	0.3	0.0909091	1.54059	0.133351	0.75362	-4.5061
4q32.2	0.3	0.0909091	1.54059	0.133351	0.75362	-4.5061
6q22.33	0.3	0.0909091	1.54059	0.133351	0.75362	-4.5061
9q33.2	0.3	0.0909091	1.54059	0.133351	0.75362	-4.5061
8p21.1	-3.26087	-1.72727	-1.53921	0.133686	0.75362	-4.50638
11p14.1	2.53913	0.030303	1.53459	0.134814	0.75362	-4.50733
9q22.32	3.37391	0.848485	1.53015	0.135907	0.75362	-4.50823
6q13	2.96957	1.0303	1.52977	0.136002	0.75362	-4.50831
1q21.2	5.57826	2.21212	1.52052	0.138303	0.75362	-4.51019
1q25.1	3.01304	1	1.52031	0.138354	0.75362	-4.51023
16q22.1	-0.73913	0.515152	-1.51263	0.140291	0.75362	-4.51179
3p14.2	-0.2	-0.0606061	-1.51039	0.140857	0.75362	-4.51224
6q21-q22.1	0.2	0.0606061	1.51039	0.140857	0.75362	-4.51224
6q22.31-q22.32	0.2	0.0606061	1.51039	0.140857	0.75362	-4.51224
9q21.13	2.91304	-0.030303	1.50763	0.141561	0.75362	-4.5128
11p13	1.82609	0.727273	1.499	0.143775	0.75362	-4.51454
Xp22.11	5.45217	-6	1.48861	0.146481	0.75362	-4.51662
Xp22.12	3.96522	-4.36364	1.48855	0.146497	0.75362	-4.51663
Xp22.31	3.46957	-3.81818	1.48851	0.146507	0.75362	-4.51664
8p22	-3.93043	-2.06061	-1.48685	0.146943	0.75362	-4.51697
2q11.1	0.269565	0.212121	1.48444	0.147578	0.75362	-4.51745
8p21.3	-8.36522	-4.9697	-1.47857	0.149133	0.75362	-4.51862
18q23	8.13478	-6.9697	1.47062	0.151259	0.75362	-4.52019
1q24.3	2.15217	1	1.46869	0.15178	0.75362	-4.52057
6q22.31	2.82609	1.0303	1.46845	0.151846	0.75362	-4.52062
4q21.3	-0.391304	0.272727	-1.46497	0.152786	0.75362	-4.52131
11p14.2-p14.1	0.143478	0	1.46167	0.153683	0.75362	-4.52196
11p14.3-p14.2	0.143478	0	1.46167	0.153683	0.75362	-4.52196
9q21.12-q21.13	0.143478	0	1.46167	0.153683	0.75362	-4.52196
10q21.3	1.41304	0.515152	1.4606	0.153976	0.75362	-4.52217
15q22.2	2.72609	1	1.45725	0.154892	0.75362	-4.52283
18q21.1-q21.2	0.247826	-0.272727	1.45683	0.155007	0.75362	-4.52291
Xp22.11-p21.3	0.247826	-0.272727	1.45683	0.155007	0.75362	-4.52291
Xp22.31-p22.2	0.247826	-0.272727	1.45683	0.155007	0.75362	-4.52291
Xp22.32	0.247826	-0.272727	1.45683	0.155007	0.75362	-4.52291
Xp22.32-p22.31	0.247826	-0.272727	1.45683	0.155007	0.75362	-4.52291
4q34.1	-3.6	-2.09091	-1.45426	0.155713	0.75362	-4.52341
7q31.2	3.28696	1.90909	1.45423	0.155721	0.75362	-4.52342
7q31.31	1.56522	0.909091	1.45364	0.155884	0.75362	-4.52354
4q34.2	-0.93913	-0.545455	-1.45228	0.15626	0.75362	-4.5238
10q22.1	5.07826	2.06061	1.44285	0.158882	0.75362	-4.52565
2q21.3	0.869565	0.393939	1.43655	0.160652	0.75362	-4.52687
8p23.1-p22	-0.313043	-0.181818	-1.43555	0.160933	0.75362	-4.52707
1p22.3	2.22609	0.848485	1.43126	0.16215	0.75362	-4.5279
16p12.3	2.55217	1.12121	1.42668	0.163458	0.75362	-4.52879
17q21.33	-9.34783	6.51515	-1.41691	0.166272	0.75362	-4.53067
10p12.2	-1.1	-0.333333	-1.4162	0.166477	0.75362	-4.5308
7p12.3	3.89565	4.48485	1.41346	0.167274	0.75362	-4.53133
17q24.3	-3.43478	2.39394	-1.41106	0.167976	0.75362	-4.53179
15q15.1	-0.743478	-0.181818	-1.41052	0.168133	0.75362	-4.5319
14q23.1	-4.64348	3.63636	-1.41011	0.168254	0.75362	-4.53198
17q21.31	-16.1304	11.2424	-1.4036	0.170169	0.75362	-4.53322
10p12.33	-0.913044	-0.363636	-1.39843	0.171699	0.75362	-4.5342
3q29	-14.3043	9.9697	-1.39651	0.172273	0.75362	-4.53457
14q22.3	-3.30435	2.30303	-1.39352	0.173167	0.75362	-4.53514
7q31.1-q31.2	0.156522	0.0909091	1.38311	0.176305	0.75362	-4.53711
8p21.1-p12	-0.156522	-0.0909091	-1.38311	0.176305	0.75362	-4.53711
8p21.2-p21.1	-0.156522	-0.0909091	-1.38311	0.176305	0.75362	-4.53711
8p22-p21.3	-0.156522	-0.0909091	-1.38311	0.176305	0.75362	-4.53711
11q22.3-q23.1	0.226087	0.242424	1.37421	0.179024	0.75362	-4.53878
7p	0.226087	0.242424	1.37421	0.179024	0.75362	-4.53878
10p12.2-p12.1	-0.1	-0.030303	-1.37333	0.179295	0.75362	-4.53895
10p14-p13	-0.1	-0.030303	-1.37333	0.179295	0.75362	-4.53895
10q21.1	-0.1	-0.030303	-1.37333	0.179295	0.75362	-4.53895
10q22.2-q22.3	0.1	0.030303	1.37333	0.179295	0.75362	-4.53895
11p12-p11.2	0.1	0.030303	1.37333	0.179295	0.75362	-4.53895
11p13-p12	0.1	0.030303	1.37333	0.179295	0.75362	-4.53895
12q14.3-q15	0.1	0.030303	1.37333	0.179295	0.75362	-4.53895
1p31.1-p22.3	0.1	0.030303	1.37333	0.179295	0.75362	-4.53895
1p32.1-p31.3	0.1	0.030303	1.37333	0.179295	0.75362	-4.53895
1p32.2-p32.1	0.1	0.030303	1.37333	0.179295	0.75362	-4.53895
1p33-p32.3	0.1	0.030303	1.37333	0.179295	0.75362	-4.53895
1q31.1-q31.2	0.1	0.030303	1.37333	0.179295	0.75362	-4.53895
21p11.1	-0.1	-0.030303	-1.37333	0.179295	0.75362	-4.53895
2p11.1	0.1	0.030303	1.37333	0.179295	0.75362	-4.53895
2p24.2	-0.1	-0.030303	-1.37333	0.179295	0.75362	-4.53895
2q21.2	0.1	0.030303	1.37333	0.179295	0.75362	-4.53895
2q21.2-q21.3	0.1	0.030303	1.37333	0.179295	0.75362	-4.53895
2q32.1	0.1	0.030303	1.37333	0.179295	0.75362	-4.53895
2q36.1	0.1	0.030303	1.37333	0.179295	0.75362	-4.53895
3q12.1-q12.2	0.1	0.030303	1.37333	0.179295	0.75362	-4.53895
3q13.12-q13.13	0.1	0.030303	1.37333	0.179295	0.75362	-4.53895
3q13.13-q13.2	0.1	0.030303	1.37333	0.179295	0.75362	-4.53895
3q13.32-q13.33	0.1	0.030303	1.37333	0.179295	0.75362	-4.53895
4q32.2-q32.3	0.1	0.030303	1.37333	0.179295	0.75362	-4.53895
6p12.1-p11.2	0.1	0.030303	1.37333	0.179295	0.75362	-4.53895
6p24.3-p24.2	0.1	0.030303	1.37333	0.179295	0.75362	-4.53895
6q22.2	0.1	0.030303	1.37333	0.179295	0.75362	-4.53895
6q22.2-q22.31	0.1	0.030303	1.37333	0.179295	0.75362	-4.53895
6q24.3	-0.1	-0.030303	-1.37333	0.179295	0.75362	-4.53895
9p13.2-p13.1	-0.1	-0.030303	-1.37333	0.179295	0.75362	-4.53895
9q21.32-q21.33	0.1	0.030303	1.37333	0.179295	0.75362	-4.53895
9q22	0.1	0.030303	1.37333	0.179295	0.75362	-4.53895
9q22.32-q22.33	0.1	0.030303	1.37333	0.179295	0.75362	-4.53895
15q21.3-q22.1	0.1	0.030303	1.37333	0.179295	0.75362	-4.53895
15q22.1	0.1	0.030303	1.37333	0.179295	0.75362	-4.53895
15q22.1-q22.2	0.1	0.030303	1.37333	0.179295	0.75362	-4.53895
15q22.2-q22.31	0.1	0.030303	1.37333	0.179295	0.75362	-4.53895
15q22.32	0.1	0.030303	1.37333	0.179295	0.75362	-4.53895
15q22.32-q22.33	0.1	0.030303	1.37333	0.179295	0.75362	-4.53895
15q22.33	0.1	0.030303	1.37333	0.179295	0.75362	-4.53895
15q23-q24.1	0.1	0.030303	1.37333	0.179295	0.75362	-4.53895
4p15.2	2.67826	-0.666667	1.37162	0.179821	0.75362	-4.53927
11q14.1	7.53478	8.84848	1.3696	0.180447	0.75362	-4.53965
14q22.3-q23.1	-0.173913	0.121212	-1.36662	0.181369	0.75362	-4.5402
17q21.32-q21.33	-0.173913	0.121212	-1.36662	0.181369	0.75362	-4.5402
17q12-q21.1	-0.173913	0.121212	-1.36662	0.181369	0.75362	-4.5402
17q24.3-q25.1	-0.173913	0.121212	-1.36662	0.181369	0.75362	-4.5402
10q22.3	3.05217	1.27273	1.36608	0.181535	0.75362	-4.5403
3q26.32	-1.73913	1.21212	-1.36427	0.1821	0.75362	-4.54064
3q27.2	-2.03043	1.51515	-1.36032	0.183333	0.75362	-4.54138
4q21.1	-0.304348	0.212121	-1.35477	0.185077	0.75362	-4.54241
9q22.33	2.9	0.878788	1.3483	0.187127	0.75362	-4.54361
11q22.3	8.46087	10.303	1.34305	0.188802	0.75362	-4.54458
15q23	2.26957	0.818182	1.34205	0.189122	0.75362	-4.54476
5q31.1	4.58261	3.60606	1.34099	0.189462	0.75362	-4.54496
17q22	-7.46087	4	-1.33307	0.19202	0.75362	-4.54641
11q25	4.4	4.33333	1.32214	0.19559	0.75362	-4.54841
1q44	1.00435	1	1.31257	0.198761	0.75362	-4.55014
3q13.33	2.86522	1.30303	1.29773	0.203754	0.75362	-4.55282
17q12	-13.3652	10.5152	-1.2897	0.206494	0.75362	-4.55425
12p12.2	1.1	1.33333	1.27941	0.210048	0.75362	-4.55608
3q27.3	-4.86522	3.09091	-1.2778	0.210607	0.75362	-4.55637
17q21.2	-16.1043	11.4242	-1.27596	0.211247	0.75362	-4.55669
15q22.31	4.7913	3.06061	1.27276	0.212367	0.75362	-4.55726
Xp11	0.234783	-0.363636	1.2718	0.212703	0.75362	-4.55743
19q13.11	-6.04348	4.21212	-1.26839	0.213904	0.75362	-4.55803
18q22.2	1.83913	-2.18182	1.2636	0.215596	0.75362	-4.55887
19q13.43	-13.8696	9.66667	-1.26144	0.216362	0.75362	-4.55925
4p15.1	0.943478	-0.757576	1.25816	0.217531	0.75362	-4.55982
8q24.22	-4.70435	5.87879	-1.25623	0.218222	0.75362	-4.56016
4q32.1	1.3913	0.030303	1.25394	0.219042	0.75362	-4.56056
3q26.2	-3.63913	2.63636	-1.24976	0.220544	0.75362	-4.56129
16p13.11	2.18261	0.878788	1.24483	0.222326	0.75362	-4.56214
22p11.2	-0.46087	0.121212	-1.24382	0.222695	0.75362	-4.56232
Xp11.22	9.06087	-14.5152	1.24189	0.223397	0.75362	-4.56265
7q31.32	2.67391	2.63636	1.239	0.224449	0.75362	-4.56315
18q22.1-q22.2	0.204348	-0.242424	1.23535	0.225786	0.75362	-4.56378
8q24	-0.204348	0.242424	-1.23535	0.225786	0.75362	-4.56378
19p13.12	-10.2913	8.27273	-1.23144	0.227226	0.75362	-4.56445
1q43	-0.365217	0.454545	-1.22806	0.228473	0.75362	-4.56503
Xp22.33	7.32174	-10.303	1.2129	0.234137	0.75362	-4.56761
14q24.3	-10.2478	7.24242	-1.20449	0.237326	0.75362	-4.56904
17q24.2	-4.30435	3	-1.19977	0.239128	0.75362	-4.56983
14q24.2	-3.91304	2.72727	-1.19976	0.239132	0.75362	-4.56983
14q24.1	-3.26087	2.27273	-1.19973	0.239144	0.75362	-4.56984
3q28	-2.86957	2	-1.1997	0.239155	0.75362	-4.56984
14q21.1	-2.21739	1.54545	-1.19961	0.239188	0.75362	-4.56986
14q13.2	-1.69565	1.18182	-1.19946	0.239247	0.75362	-4.56988
17q24.1	-1.43478	1	-1.19931	0.239302	0.75362	-4.56991
14q13.3	-1.30435	0.909091	-1.19921	0.239344	0.75362	-4.56993
8q21.2	-1.30435	0.909091	-1.19921	0.239344	0.75362	-4.56993
14q13.1	-0.913044	0.636364	-1.19856	0.239591	0.75362	-4.57003
11p14.3	1.07391	0.151515	1.19431	0.241225	0.75362	-4.57075
9q13	1.42174	-1.09091	1.19412	0.241299	0.75362	-4.57078
15q12	-0.391304	0.272727	-1.19298	0.241739	0.75362	-4.57097
14q31.1	-1.65217	1.15152	-1.19281	0.241803	0.75362	-4.571
7q31.33	1.37826	0.939394	1.1924	0.24196	0.75362	-4.57107
8q13.3	-1.13043	0.787879	-1.19093	0.242529	0.75362	-4.57131
6p21.1	-11.3913	7.93939	-1.18874	0.24338	0.75362	-4.57168
15q26.3	1.16522	0.787879	1.18252	0.2458	0.75362	-4.57271
Xp11.3	7.77391	-12.8182	1.18201	0.246001	0.75362	-4.5728
Showing 1 to 30 of 995 entries, 8 total columns
